# Supplementary material for: Mutant KRAS Conversion of Conventional T Cells into Regulatory T Cells
Source: Oxford University Press journal article supplement (doi:10.1158/2326-6066.cir-15-0241), 2016-02-15
Supplement: 23266066cir150241-sup-155996_1_supp_data_3266907_nz9bpd.docx [file 23266066cir150241-sup-155996_1_supp_data_3266907_nz9bpd.docx]

**Supplemental Figure 1**

1. mRNA level of Kras in wild-type Kras tumor cells (Colo320) overexpressing mutant KrasG12V plasmid (Kras Pd) is significantly higher than cells with a mock plasmid.
2. Representative dot plots showing that the percentage of IL-10+ and TGF-β1+, CTLA-4+ and CD122+ T-lymphocytes co-cultured with wild-type Kras tumor cells (Colo320) overexpressing mutant KrasG12V plasmid (Kras Pd) is significantly higher than WT-cells.
